# Supplementary material
Source: MDPI journal article supplement (https://www.mdpi.com/2076-3263/8/7/257)
Supplement: s1 [file s1]

## Sheet: Table_1
Location Name	Latitude	Longitude	Elevation (m)	Weighted Annual d18O (‰)	Weighted Annual dD (‰)	Weighted Annual d-excess (‰)	Summer d18O (‰)	Summer d-excess (‰)	Winter d18O (‰)	Winter d-excess (‰)	d18O Δ (‰) Winter - Summer	d-excess Δ (‰) Winter - Summer	Reference
Adana	36.98	35.3	73	-5.58	-29	15.6	-2.68833	8.35	-5.63167	15.5333	-2.94333	7.18333	GNIP
Addis Ababa	9	38.73	2360	-1.28	3.3	13.56	-1.29833	13.27	-0.346667	12.225	0.951667	-1.045	GNIP
Agco	7.02	125.23	1265	-9.11	-59.77	14.24	-9.46667	15.2633	-7.12167	12.995	2.345	-2.26833	GNIP
Akqi	40.9333	78.45	1984.9	-39.8	-6.4	11.2	-6.2	11.3	-13.4	10.9	-7.2	-0.4	Wang et al. (2016)
Aksu	41.1667	80.2333	1103.8	-28.5	-4.7	9.2	-4.6	9.3	-11.9	3.9	-7.3	-5.4	Wang et al. (2016)
Aleppo	36.11	37.13	410	-6.98	-38.3	17.53							GNIP
Alexandria	31.2	29.95	-3	-3.95	-15.9	16							GNIP
Altay	47.8449	88.1413	737	-97.35	-13.35	9							Tian et al. (2007)
Amderma	69.46	61.41	53	-15.48	-110.1	14.4	-13.0417	13.0833	-18.2017	13.1333	-5.16	0.05	GNIP
Amman	31.98	35.93	850	-6.99	-30.3	23.6							GNIP
Ankara	39.95	32.88	902	-8.2	-54.1	11.6	-5.16333	7.7	-9.66	12.4333	-4.49667	4.73333	GNIP
Antalya	36.88	30.7	49	-5.64	-29.1	16.1	-3.49667	10.2833	-5.32833	15.8	-1.83167	5.51667	GNIP
Arkhangelsk	64.58	40.5	13	-12.85	-94.9	9.4	-10.645	6.86667	-16.8633	6.75	-6.21833	-0.116667	GNIP
Asela	7.57	39.08	2250	-1.05	0	8.41							GNIP
Astrakhan	46.25	48.03	-18	-7.67	-57.1	4.2	-6.11	2.43333	-10.2283	6.11667	-4.11833	3.68333	GNIP
Athens	37.9	23.73	27	-6.38	-36.8	14.3	-4.185	7.56667	-6.09667	13.6333	-1.91167	6.06667	GNIP
Bahrain	26.27	50.62	2	-0.71	6	13.4							GNIP
Baicheng	41.7833	81.9	1229.2	-25.2	-3.9	5.9	-2.6	6	-24.1	-0.7	-21.5	-6.7	Wang et al. (2016)
Balas-Balas	9.29	123.17	827	-6.36	-39.59	11.28	-7.27167	11.9667	-4.282	12.62	2.98967	0.653333	GNIP
Balasbas	13.1	123.9	150	-3.35	-18.56	8.22	-5.38667	10.1833	-2.14667	11.35	3.24	1.16667	GNIP
Balguntay	42.7333	86.3	1739	-52.1	-7.8	10.3							Wang et al. (2016)
Bangkok	13.73	100.5	2	-6.69	-43.8	9.6	-6.365	9.01667	-3.03667	7.8	3.32833	-1.21667	GNIP
Baotou	40.67	109.85	1067	-7.79	-55.27	6.97	-7.12667	5.78333	-10.965	13.15	-3.83833	7.36667	GNIP
Barkol	43.6	93.05	1677.2	-88.8	-12.3	9.6	-10.5	10.2	-24.2	5.9	-13.7	-4.3	Wang et al. (2016)
Batalagoda	7.32	80.27	139	-5.45	-30.26	10.76	-3.39333	8.16667	-5.36333	10.3333	-1.97	2.16667	GNIP
Batticaloa	7.42	81.43	5	-4.69	-25.1	12.4	-3.49	10.6167	-4.245	12.6667	-0.755	2.05	GNIP
Batumi	41.39	41.38	6	-9.37	-60.2	15.6	-6.96667	16.6167	-10.1583	13.7	-3.19167	-2.91667	GNIP
Bayanbulak	43.0333	84.15	2458	-52.6	-8.4	14.6	-7.7	14.8	-26.2	6.2	-18.5	-8.6	Wang et al. (2016)
Beer Sheva	31.23	34.78	270	-4.92	-24	15.4							GNIP
Belgaum	15.86	74.5	2572	-1.51	6.3	18.4							Kumar et al. (2010)
Bet Dagan	32	34.82	30	-5.16	-22.9	18.3							GNIP
Bhopalpalli	18.27	79.52	227.2	-4.46	-25.68	10							GNIP
Bonga	13.03	123.92	600	-6.09	-35	13.7	-6.44667	13.0833	-2.90333	12	3.54333	-1.08333	GNIP
Botong	13.05	123.97	475	-4.73	-23.3	14.6	-6.03833	12.5	-2.89	14.8167	3.14833	2.31667	GNIP
Brest	52.07	23.41	142	-9.76	-71	7.08	-7.865	6.58333	-12.115	7.88333	-4.25	1.3	GNIP
Caijiahu	44.2	87.5333	440.5	-83.2	-11.8	11.2	-8.4	10.5	-22	11.5	-13.6	1	Wang et al. (2016)
Cawayan	13.03	123.94	731	-6.39	-36.5	14.7	-6.525	14.0333	-3.13833	14.1333	3.38667	0.1	GNIP
Changsha	28.12	113.04	37	-5.63	-32.1	13.02	-7.185	9.63333	-4.00667	15.8167	3.17833	6.18333	GNIP
Chengdu	30.67	104.02	506	-6.85	-50.3	4.6	-6.78667	5.85	-4.795	1.08333	1.99167	-4.76667	GNIP
Chinpak	18.28	79.44	238.2	-4.26	-26.4	7.68							GNIP
Chongqing	29.62	106.6	192	-11.37	-76.12	14.84							GNIP
Colombo	6.54	79.52	7	-3.7	-20	9.6	-2.52333	9.35	-4.68	9.65	-2.15667	0.3	GNIP
Dabancheng	43.35	88.3167	1103.5	-52.6	-8.3	13.8	-7.5	13.9	-35.3	13.9	-27.8	-2.13163e-14	Wang et al. (2016)
Dalbahce	39.31	41.49	1695	-10.2	-63.42	11.58	-4.36	7.03333	-14.3517	11.1167	-9.99167	4.08333	GNIP
Damascus	33.25	36.31	625	-7.97	-43.5	20.2							GNIP
Devprayag	30.18	78.6	755.75	-8.02	-53.79	10.37							Kumar et al. (2010)
Dhaka	23.786	90.42	13.12	-5.44	-33.9	9.7	-5.87	9.9	-3.45167	7.91667	2.41833	-1.98333	GNIP
Diyarbakir	37.93	40.21	692.33	-6.36	-34.8	16.1	-4.2875	10.475	-6.87333	16.45	-2.58583	5.975	GNIP
Dudinka	69.41	96.18	56.85	-133.5	-15.8	3.1							GNIP
Enisejsk	58.27	92.09	98	-13.29	-98.43	7.91	-11.8833	9.4	-17.8333	3.5	-5.95	-5.9	GNIP
Erdemli	36.36	34.22	10	-7.16	-37.44	22.41							GNIP
Fuzhou	26.05	119.17	16	-6.8	-44.5	9.4	-6.49333	8.46667	-5.03333	12.85	1.46	4.38333	GNIP
Gaize	32.3027	84.0626	4416	-95.7364	-12.9818	13.5							Tian et al. (2007)
Gangotri	30.99	78.94	11204	-11.85	-85.42	9.38							Kumar et al. (2010)
Gomukh	30.86	79.2	5147.52	-13.74	-95.58	14.34							Kumar et al. (2010)
Gorkij	56.13	43.49	82	-12.54	-89.78	11.3	-10.1983	7.66667	-14.0417	12.1	-3.84333	4.43333	GNIP
Guangzhou	23.13	113.32	7	-5.89	-41.01	6.1	-5.975	5.3	-3.198	7.28	2.777	1.98	GNIP
Guilin	25.07	110.08	170	-6.15	-35.48	14.8	-7.815	12.9167	-3.375	16.4167	4.44	3.5	GNIP
Guiyang	26.35	106.43	1071	-8.17	-51.1	14.3	-9.12167	13.0667	-4.31333	20.2333	4.80833	7.16667	GNIP
Guwahati	26.13	91.74	59.51	-3.4	-26.8	0.4							Kumar et al. (2010)
Guzeloluk	36.54	34.07	1400	-9.18	-59.8	18.5	-5.904	12.56	-9.45	18.45	-3.546	5.89	GNIP
Habarovsk	48.52	135.17	72	-14.29	-102.93	11.42	-13.7667	9.96667	-18.96	6.48	-5.19333	-3.48667	GNIP
Haerbin	45.68	126.62	172	-9.4	-74.4	0.8	-8.945	3.98333	-15.2125	14.2	-6.2675	10.2167	GNIP
Haikou	20.02	110.21	15	-5.79	-38.4	7.9	-6.89667	8.56667	-3.195	9.9	3.70167	1.33333	GNIP
Hambantota	6.07	81.08	20	-4.9	-27.4	11.8	-3.325	9.83333	-5.14333	10.9833	-1.81833	1.15	GNIP
Hami	42.8167	93.5167	737.2	-144.2	-18.6	4.6	-5.5	-2.8	-27.6	10.1	-22.1	12.9	Wang et al. (2016)
Har Kna'an	32.97	35.5	964	-6.77	-29.4	23.2							GNIP
Heraklion	35.33	25.18	47	-5.74	-30.1	15.8							GNIP
Hetian	37.08	79.56	1375	-5.95	-35	12.6	-2.92167	11.45	-16.746	4.62	-13.8243	-6.83	GNIP
Homs	34.45	36.43	490	-6.41	-32.26	19.05							GNIP
Hong Kong	22.32	114.17	65	-6.67	-42.7	10.4	-6.605	9.96667	-2.99333	11.6333	3.61167	1.66667	GNIP
Ilomavis	7.04	125.19	740	-8.5	-52.7	15.3	-8.82833	14.5167	-5.69333	12.1667	3.135	-2.35	GNIP
Inang Maharang	13.07	123.91	285	-3.74	-16.62	13.33	-5.94	12.4667	-2.525	13.15	3.415	0.683333	GNIP
Irbid	32.53	35.85	555	-6.78	-32.3	21.9							GNIP
Izmir	38.41	27.16	78.55	-5.35	-30.5	12.4	-4.082	8.44	-5.32	12.15	-1.238	3.71	GNIP
Izraa	32.52	36.15	580	-6.58	-33.13	19.52							GNIP
Jammu	32.72	74.87	1073	-4.03	-22.56	9.68	-4.42	10.65	-1.98833	9.56667	2.43167	-1.08333	Kumar et al. (2010)
Jinghe	44.6167	82.9	320.1	-37.2	-5	2.8	-4.9	3.5	-16.3	-12.4	-11.4	-15.9	Wang et al. (2016)
Jinzhou	41.13	121.1	66	-8.54	-59.3	9							GNIP
Kabul	34.67	69.08	1860	-7.15	-36	16.9	-2.13333	12.5333	-8.45	19.0833	-6.31667	6.55	GNIP
Kakinada	16.99	82.26	7.12	-5.93	-35.2	10.3	-4.79167	10.0667	-5.3075	14.35	-0.515833	4.28333	Kumar et al. (2010)
Kalinin	56.54	35.54	31	-11.76	-83	10.7	-9.20667	9.5	-15.125	8.71667	-5.91833	-0.783333	GNIP
Kamalapur	18.29	79.54	227.2	-4.23	-23.6	10.22							GNIP
Kanlas	6.99	125.24	1695	-9.58	-63.22	13.44	-9.51	13.5333	-7.72833	12.1667	1.78167	-1.36667	GNIP
Karachi	24.9	67.13	23	-3.8	-22.5	9.1	-4.15	3.6	-2.43	5.4	1.72	1.8	GNIP
Khanty-Mansiysk	60.96	69.07	35.47	-11.62	-92.5	0.4	-11.0667	0.633333	-19.31	0	-8.24333	-0.633333	GNIP
Kharkiv	49.99	36.26	108.3	-8.73	-59.9	9.9	-6.10833	8.03333	-11.4517	9.75	-5.34333	1.71667	GNIP
Khartoum	15.6	32.55	382	-1.83	-7.1	6.6							GNIP
Kirov	58.39	49.37	164	-13.37	-101.5	5.8	-10.8033	5.23333	-16.9117	5.2	-6.10833	-0.0333333	GNIP
Ko Samui	9.28	100.03	7	-5.97	-28.7	10.8	-4.69833	10.2	-4.16333	10.85	0.535	0.65	GNIP
Ko Sichang	13.17	100.8	0	-6.61	-42.8	10.09	-6.165	9.26667	-5.028	11.14	1.137	1.87333	GNIP
Kocbeyli	37.45	30.33	1025	-10.2	-70.4	11.1	-6.38833	13.4667	-10.7533	9.08333	-4.365	-4.38333	GNIP
Kolkata	22.59	88.38	7.04	-7.91	-57.4	3.8							GNIP
Korla	41.75	86.1333	931.5	-33.5	-4.5	2.5	-1.6	1.7	-26.8	12	-25.2	10.3	Wang et al. (2016)
Kounietra	33.05	35.57	930	-7.41	-39.09	20.18							GNIP
Kozagac	37.03	29.39	610	-6.09	-35.57	13.64							GNIP
Kozhikode	11.15	75.47	20	-2.89	-12	10.8	-2.98833	10.5833	-5.555	11.275	-2.56667	0.691667	GNIP
Kumamoto	32.81	130.69	8.26	-7.5	-50.9	9.1							GNIP
Kumux	42.2333	88.2167	922.4	-63.3	-8.6	5.5	-5.5	5.7	-25.3	3.9	-19.8	-1.8	Wang et al. (2016)
Kunming	25.01	102.41	1892	-10.41	-71.9	11.4	-10.05	10.8167	-4.62	4.55	5.43	-6.26667	GNIP
Kuqa	41.7167	82.9667	1081.9	-38.6	-5.7	7	-2.9	6.2	-25.8	11.9	-22.9	5.7	Wang et al. (2016)
Kursk	51.73	36.15	234.03	-8.91	-68	3.3							GNIP
Kuytun	44.4	84.8667	562	-65.7	-9.6	11.1	-6.9	12.3	-24.5	4.1	-17.6	-8.2	Wang et al. (2016)
Lanzhou	36.05	103.88	1517	-4.76	-32.3	7.1	-5.41167	8.78333	-12.764	13.66	-7.35233	4.87667	GNIP
Lhasa	29.42	91.08	3649	-17.55	-129.6	10.8	-14.9083	10.55	-12.246	17.66	2.66233	7.11	GNIP
Linxia	35.64	103.26	1825.12	-45.7	-7.7	14.1							Hough et al. 2011
Liuzhou	24.35	109.4	97	-6.43	-43.52	7.94	-7.62667	6.51667	-3.60333	5.33333	4.02333	-1.18333	GNIP
Luang-Prabang	19.88	102.13	305	-7.73	-53.6	8.3	-8.13333	8.65	-3.0325	8.4	5.10083	-0.25	GNIP
Lucknow	26.86	80.93	114.82	-7.24	-49.7	8.3							GNIP
Luntai	41.7833	84.25	976.1	-63.5	-9.3	10.9	-7	10.8	-25	6.7	-18	-4.1	Wang et al. (2016)
L'vov	49.49	23.57	329	-9.96	-72	8.5	-8.20333	6.15	-12.7433	10.9167	-4.54	4.76667	GNIP
Maha Illuppallama	8.07	80.28	137	-4.92	-33.67	11.24							GNIP
Maneri	45.173	28.71	31.5	-4.62	-27.61	9.35	-5.15	4.61667	-4.36	10.62	0.79	6.00333	Kumar et al. (2010)
Manila	14.52	121	14	-6.58	-43.8	8.8	-6.47667	9.03333	-3.24833	5.15	3.22833	-3.88333	GNIP
Minsk	52.52	27.32	225	-11.39	-80.1	11	-8.69833	10.75	-13.2467	12.25	-4.54833	1.5	GNIP
Moscow	55.75	37.57	157	-11.12	-89.1	-2.1	-8.56833	-5.2	-14.52	3.23333	-5.95167	8.43333	GNIP
Mugla	37.21	28.36	641.2	-5.26	-30.63	11.45							GNIP
Mumbai (Bombay)	18.9	72.82	10	-1.34	-2.6	8.7							GNIP
Murmansk	68.58	33.03	46	-12.47	-91.8	6.4	-11.0167	9.18333	-15.5367	9.3	-4.52	0.116667	GNIP
Naimakka	68.41	22.21	403	-15.98	-117.4	9.8	-13.8083	7.75	-19.1633	10.3333	-5.355	2.58333	GNIP
Nanjing	32.18	118.18	26	-7.97	-51.4	12.3	-7.95	12.5	-6.46	16.1	1.49	3.6	GNIP
Nasaram	18.26	79.47	227.2	-4.09	-28.36	4.32							GNIP
Nasuji	9.28	123.15	1096	-6.3	-35.66	14.73	-7.06333	14.2333	-4.026	16.08	3.03733	1.84667	GNIP
New Delhi	28.58	77.2	212	-5.86	-37.5	8.7	-4.44833	6.45	-1.67167	7.81667	2.77667	1.36667	GNIP
Novosibirsk	55.03	82.9	162	-14.64	-104.26	12.82	-12.4167	14.5	-19.5	9.16667	-7.08333	-5.33333	GNIP
Nuwara Eliya	6.58	80.46	1880	-6.38	-37.2	13.9	-4.98333	13.2167	-7.19667	13.65	-2.21333	0.433333	GNIP
Nyalam	28.1552	85.9822	3811	-72.3833	-10.7083	7.3							Tian et al. (2007)
Odessa	46.48	30.63	64	-8.94	-65.11	8.79	-7.57833	6.01	-10.9567	12.025	-3.37833	6.015	GNIP
Olenek	68.5	112.43	198.06	-18.67	-145.5	3.8	-19.0067	3.33333	-29.04	2.51667	-10.0333	-0.816667	GNIP
Omsk	54.98	73.33	87.38	-13.46	-98.2	8.9	-9.375	7.25	-18.4	7.45	-9.025	0.2	GNIP
Pabunsaran	7	125.25	1716	-9.55	-62.75	13.63	-9.69	13.85	-8.04333	12.2833	1.64667	-1.56667	GNIP
Palayang Bayan	13.06	123.93	520	-3.67	-12.32	17	-6.46333	13.9833	-2.98667	14.8167	3.47667	0.833333	GNIP
Palmyra	34.33	38.18	400	-3.29	-8.7	17.6							GNIP
Pechora	56.07	57.06	56	-14.96	-109.5	9.2	-12.3467	8.2	-18.5217	11.5333	-6.175	3.33333	GNIP
Perm	58.01	56.18	161	-12.53	-92.1	13.9	-10.8733	13.9667	-16.6233	12.95	-5.75	-1.01667	GNIP
Pohang	36.03	129.38	6	-7.78	-50.9	10	-7.945	8.83333	-6.425	16.3	1.52	7.46667	GNIP
Puhagan	9.29	123.17	769	-5.54	-32.19	12.15	-6.73667	12.0333	-3.694	12.62	3.04267	0.586667	GNIP
Puttalam	8.02	79.5	2	-4.8	-27.2	11.3	-3.094	8.66	-4.245	12.0333	-1.151	3.37333	GNIP
Qiqihar	47.23	123.55	147	-10.57	-79.1	5.5	-9.87833	5.23333	-21.43	7.85	-11.5517	2.61667	GNIP
Qitai	44.0167	89.5667	793.5	-73.1	-11.1	15.7	-9.1	17.9	-20.3	9.7	-11.2	-8.2	Wang et al. (2016)
Rabba	31.2	35.75	970	-4.89	-15.4	18.3							GNIP
Rhodes	36.38	28.1	42	-4.72	-19.8	19.2							GNIP
Riga	56.97	24.07	3	-9.73	-72.6	11	-8.47	9.95	-10.5233	13.3833	-2.05333	3.43333	GNIP
Rishikesh	30.08	78.26	1220	-10.36	-76.84	6.04							Kumar et al. (2010)
Rize	40.97	40.7	652.18	-8.32	-51	15.5	-5.82333	13.5	-9.86167	15.1833	-4.03833	1.68333	GNIP
Rjazan	54.37	39.43	135	-11.24	-75.5	14.5	-10.2383	16.4833	-14.1967	10.1167	-3.95833	-6.36667	GNIP
Roorkee	29.86	77.89	879	-6.08	-39.55	9.09	-5.28667	8.5	-2.065	15.4	3.22167	6.9	Kumar et al. (2010)
Rostov-Na-Donu	47.25	39.82	77	-8.68	-67.3	9.5	-5.885	6.1	-10.0867	8.13333	-4.20167	2.03333	GNIP
Sagar	28.84	78.74	1401	-4.99	-30.46	9.46							GNIP
Salagiri	18.19	79.44	266.8	-5.04	-33.36	6.97							GNIP
Salekhard	66.53	66.67	9.29	-16.52	-127.7	4.5	-13.495	4.25	-21.4917	3.06667	-7.99667	-1.18333	GNIP
Saratov	51.34	46.02	166	-11.07	-77	9.9	-8.50167	5.78333	-13.56	12.0333	-5.05833	6.25	GNIP
Senyurt	39.38	41.01	2160	-10.3	-67.2	15.9	-5.92833	16.9333	-14.5183	11.4667	-8.59	-5.46667	GNIP
Shihezi	44.3167	86.05	442.9	-84.4	-12.1	12.4	-7.1	10.7	-23.4	15.9	-16.3	5.2	Wang et al. (2016)
Shijiazhuang	38.02	114.25	80	-7.75	-54.3	7.7	-7.10167	7.78333	-8.66333	11.0167	-1.56167	3.23333	GNIP
Shillong	25.57	91.88	1598	-6.13	-35.8	13.2	-7.45833	11.4333	-1.748	13.7	5.71033	2.26667	GNIP
Shiquanhe	32.494	80.1016	4279	-105.822	-14.0111	7.4							Tian et al. (2007)
Shisanjianfang	43.2167	91.7333	721.4	-33.3	-3.6	-4.5	-1.6	-5.2	-20.4	-1.7	-18.8	3.5	Wang et al. (2016)
Shoubak	30.27	35.58	1300	-6.14	-26.2	22.9							GNIP
Sidi Barrani	31.63	25.96	23	-3.83	-16.9	13.8							GNIP
Sinop	42.02	35.14	20.97	-8.25	-52.3	13.7	-7.07	12.3167	-8.68333	13.2333	-1.61333	0.916667	GNIP
St. Petersburg	59.58	30.18	4	-11.45	-87.4	7.9	-10.1717	7.41667	-12.6083	8.96667	-2.43667	1.55	GNIP
Suwieda	32.49	36.44	1020	-7.29	-37.76	20.53							GNIP
Taiyuan	37.78	112.55	778	-8.94	-64.7	6.8							GNIP
Tambov	52.44	41.28	139	-10.83	-78.9	7.6	-10.49	10.72	-12.0417	5.2	-1.55167	-5.52	GNIP
Tartous	34.53	35.53	5	-4.96	-22.91	16.8							GNIP
Tashkent	41.31	69.24	445.72	-7.04	-42.9	13.1							GNIP
Tehran	35.68	51.32	1200	-6.59	-40.7	12.1	-1.88167	1.85	-5.94167	11.4	-4.06	9.55	GNIP
Tehri	30.38	78.44	5741	-6.79	-44.55	9.77	-6.78333	6.76667	-4.85	14.675	1.93333	7.90833	Kumar et al. (2010)
Tianjin	39.06	117.1	3	-7.47	-47.7	12.1	-6.66667	10.0167	-8.69667	12	-2.03	1.98333	GNIP
Ticala	9.31	123.2	350	-5.63	-33.25	11.8	-7.01	11.7667	-4.096	11.38	2.914	-0.386667	GNIP
Tirunelveli	8.73	77.75	154	-3.05	-17.51	6.89							GNIP
Tundla Buzurg	18.32	79.47	227.2	-4.34	-27.28	7.44							GNIP
Turpan	42.9333	89.2	34.5	-105.3	-12.1	-8.5	-2.5	-14.3	-25.6	-0.6	-23.1	13.7	Wang et al. (2016)
Ulaanbaatar	46.56	106.59	1338	-8.46	-64.8	2.9	-10.1233	6.8	-20.9067	0.533333	-10.7833	-6.26667	GNIP
Uttarkashi	30.73	78.43	3799	-4.72	-25.73	12.03	-4.26	12.28	-4.80833	15.9667	-0.548333	3.68667	Kumar et al. (2010)
Vologda	59.17	39.52	118	-13.29	-98.89	6.73	-10.4733	6.13333	-16.465	6.55	-5.99167	0.416667	GNIP
Wuhan	30.62	114.13	23	-7.06	-50.8	5.7	-6.88167	3.6	-4.98333	6.81667	1.89833	3.21667	GNIP
Wulumuqi	43.78	87.62	918	-10.59	-72.2	12.5	-8.22167	9.11667	-16.9733	17.9667	-8.75167	8.85	GNIP
Wuqia	39.7167	75.25	2175.7	-34.5	-6.1	14.3	-5.4	14.7	-23.1	14.4	-17.7	-0.3	Wang et al. (2016)
Xian	34.3	108.93	397	-7.49	-49.13	10.8	-7.905	11.0483	-8.05833	13.365	-0.153333	2.31667	GNIP
Xunhua	35.85	102.48	1872.53	-38.9	-6.5	13.8							Hough et al. 2011
Yakutsk	62.04	129.67	118.17	-19.16	-150.3	3	-16.8683	2.61667	-30.8183	2.4	-13.95	-0.216667	GNIP
Yangoon	16.77	96.17	20	-4.47	-29.5	6.2							GNIP
Yantai	39.53	121.4	47	-7.18	-51	6.5	-6.72333	6.01667	-7.564	13.44	-0.840667	7.42333	GNIP
Yap	9.49	138.09	15	-5.59	-34.3	9.2	-6.00167	10.5333	-4.09333	7.45	1.90833	-3.08333	GNIP
Yinchuan	38.29	106.13	1112	-7.21	-44.8	12.9	-6.54833	11.7167	-13.086	14.52	-6.53767	2.80333	GNIP
Yining	43.95	81.3333	662.5	-99.7	-13.6	9.1	-7.1	9.4	-21.1	8.1	-14	-1.3	Wang et al. (2016)
Yiwu	43.2667	94.7	1728.6	-73.5	-10.5	10.5	-10.1	10.2	-28.4	28.7	-18.3	18.5	Wang et al. (2016)
Yushu	32.9931	97.0088	3682	-89.1167	-13.275	15.3							Tian et al. (2007)
Zhengzhou	34.72	113.65	110	-7.35	-52.7	6.1	-6.77167	2.83333	-6.28833	8.4	0.483333	5.56667	GNIP
Zunyi	27.7	106.88	844	-8.4	-55.2	11.68	-8.87	9.63333	-4.03833	13.05	4.83167	3.41667	GNIP
Summer is defined as May-Oct except for Wang et al. (2016) values which are Apr-Oct. Winter is defined as Nov-Apr. Seasonal datasets are limited as not all sites report monthly data year-round. Seasonal averages were only calculated if at least 4/6 months were reported per season. This was not possible for sites with little to no seasonal precipitation (e.g. summer in Bahrain and Tashkent or wint…
